# Supplementary material for: Effectiveness of a modified Balint group process on empathy and psychological skills employing Kirkpatrick’s evaluation framework
Source: PeerJ. 2023 Jul 19;11:e15279. doi: 10.7717/peerj.15279 (PMC10362841; doi:10.7717/peerj.15279)
Supplement: Supplemental Information 1 [file peerj-11-15279-s001.xlsx]

## Sheet: Data
Name	gender	JEffersonSCALe_T1	PMI1_T1	PMI2_T1	PMI3_T1	PMI4_T1	PMI5_T1	PMI6_T1	PMI7_T1	PMI8_T1	PMI_T1	PMI10_T1	PMI11_T1	Q1_T1	Q2_T1	Q3_T1	Q4_T1	Q5_T1	PQ6_T1	Q7_T1	Q8_T1	Q9_T1	Q10_T1	Q11_T1	Q12_T1	Q13_T1	Q14_T1	Q15_T1	Q16T1	Q17T1	Q18_T1	Q19_T1	Q20_T1	JEffersonSCALe_T2	PMI1_T2	PMI2_T2	PMI3_T2	PMI4_T2	PMI5_T2	PMI6_T2	PMI7_T2	PMI8_T2	PMI_T2	PMI10_T2	PMI11_T2	Q1_T2	Q2_T2	Q3_T2	Q4_T2
resident 1	1	103	3	4	4	5	2	4	4	3	2	5	5	4	6	6	4	4	6	6	6	4	5	6	5	4	6	6	4	3	5	7	6	93	3	4	5	6	3	3	4	4	4	5	5	5	6	6	3
resident 2	1	124	7	4	5	6	5	5	4	5	5	5	5	7	7	3	5	7	3	7	7	6	7	7	7	7	7	7	7	5	4	7	7	122	7	5	6	6	6	6	6	6	6	5	6	7	7	3	7
resident 3	1	103	5	5	5	4	4	5	3	4	4	4	4	5	5	5	5	4	5	4	5	5	5	7	7	5	7	6	5	5	3	4	6	123	6	6	6	6	6	6	5	6	6	6	6	6	7	6	6
resident 4	1	124	7	4	5	6	5	5	4	5	5	5	5	7	7	3	5	7	3	7	7	6	7	7	7	7	7	7	7	5	4	7	7	124	7	4	5	6	5	5	4	5	5	5	5	7	7	3	5
resident 5	1	111	6	4	6	6	6	5	2	3	4	4	6	7	7	6	7	4	5	6	3	5	7	7	7	5	7	6	6	4	1	4	7	90	5	4	5	4	4	4	4	4	4	5	5	4	4	4	6
resident 6	1	74	3	2	2	3	3	3	3	3	3	3	2	4	4	2	4	3	3	5	4	3	3	6	5	3	3	5	5	2	3	2	5	121	6	5	5	5	5	5	5	5	6	5	5	7	7	6	6
resident 7	2	135	6	6	7	7	6	6	6	6	6	7	7	7	6	7	7	7	7	7	7	7	7	7	7	7	7	7	7	7	5	5	7	137	6	5	6	6	6	6	6	6	6	6	6	7	7	7	7
resident 8	2	108	2	2	6	4	4	4	6	4	3	3	3	6	5	5	6	6	5	6	6	5	5	6	6	5	6	5	5	4	4	6	6	113	5	5	5	5	5	5	5	5	5	5	5	6	5	6	6
resident 9	2	114	6	5	5	6	6	6	5	5	4	5	6	6	6	6	6	5	4	6	6	6	6	6	6	6	6	6	6	4	4	7	6	106	6	6	6	6	5	6	5	5	5	6	6	2	7	6	6
resident 10	2	122	7	7	7	7	7	7	5	5	6	6	5	4	6	7	4	6	7	7	7	5	5	7	7	5	7	7	6	5	6	7	7	128	7	6	6	6	6	6	5	6	5	6	5	6	7	6	6
resident 11	2	90	4	3	4	4	4	4	4	2	3	4	4	3	5	4	4	5	4	3	6	4	5	6	6	4	7	5	5	3	3	3	5	107	4	4	4	5	5	5	5	4	4	4	5	7	7	6	5
resident 12	2	104	2	3	6	4	6	5	4	5	6	5	6	5	7	6	5	6	6	3	4	5	6	6	6	5	6	6	5	4	2	5	6	97	4	6	5	3	4	4	4	5	4	4	5	5	5	5	5
resident 13	2	113	5	5	7	6	6	6	4	5	6	6	6	7	7	5	4	5	6	6	6	7	6	6	6	4	7	3	7	5	3	7	6	126	6	5	6	5	5	5	5	5	6	7	6	7	7	7	6
resident 14	2	113	5	5	7	6	6	6	4	5	6	6	6	7	7	5	4	5	6	6	6	7	6	6	6	4	7	3	7	5	3	7	6	126	6	5	6	5	5	5	5	5	6	7	6	7	7	7	6
[truncated: 90 more columns]

## Sheet: Code
Name	resident name			T1	T1 refers to beginning of the trial
gender	1 female 2 Male			T2	T2 after 6 months of using the traditional Balint
JEffersonSCALe_T1	Jefferson Scale Total at time 1, beginign of trial, traditional balint implemented			M1	M1 is the beginning of the second 6 months period where modified balint was implemented
PMI1_T1	Score of each item of Psychological Medical Inventory at T1			M2	M2 at the end of the trial, while using the modified Balint
PMI2_T1
PMI3_T1
PMI4_T1
PMI5_T1
PMI6_T1
PMI7_T1
PMI8_T1
PMI_T1
PMI10_T1
PMI11_T1
Q1_T1	Score of each item on Jeffereson Scale at T1
Q2_T1
Q3_T1
Q4_T1
Q5_T1
PQ6_T1
Q7_T1
Q8_T1
Q9_T1
Q10_T1
Q11_T1
Q12_T1
Q13_T1
Q14_T1
Q15_T1
Q16T1
Q17T1
Q18_T1
Q19_T1
Q20_T1
JEffersonSCALe_T2
PMI1_T2
PMI2_T2
PMI3_T2
PMI4_T2
PMI5_T2
PMI6_T2
PMI7_T2
PMI8_T2
PMI_T2
PMI10_T2
PMI11_T2
Q1_T2
Q2_T2
Q3_T2
Q4_T2
Q5_T2
PQ6_T2
Q7_T2
Q8_T2
Q9_T2
Q10_T2
Q11_T2
Q12_T2
Q13_T2
Q14_T2
Q15_T2
Q16T2
Q17T2
Q18_T2
Q19_T2
Q20_T2
JEffersonSCALe_M1
PMI1_M1
PMI2_M1
PMI3_M1
PMI4_M1
PMI5_M1
PMI6_M1
PMI7_M1
PMI8_M1
PMI_M1
PMI10_M1
PMI11_M1
Q1_M1
Q2_M1
Q3_M1
Q4_M1
Q5_M1
PQ6_M1
Q7_M1
Q8_M1
Q9_M1
Q10_M1
Q11_M1
Q12_M1
Q13_M1
Q14_M1
Q15_M1
Q16M1
Q17M1
Q18_M1
Q19_M1
Q20_M1
JEffersonSCALe_M2
PMI1_M2
PMI2_M2
PMI3_M2
PMI4_M2
PMI5_M2
PMI6_M2
PMI7_M2
PMI8_M2
PMI_M2
PMI10_M2
PMI11_M2
Q1_M2
Q2_M2
Q3_M2
Q4_M2
Q5_M2
PQ6_M2
Q7_M2
Q8_M2
Q9_M2
Q10_M2
Q11_M2
Q12_M2
Q13_M2
Q14_M2
Q15_M2
Q16M2
Q17M2
Q18_M2
Q19_M2
Q20_M2
Traditional_score_difference	Difference in the scores of traditional from T2-T1
Modfiied_score_difference	Differenc ein the scores of the Modified from M2-M1
PMI	Psychological Medicine Inventory (Likert scale of 7, 9 items)
PMI_t1_sum	Sum of PMI items score at T1
PMI_T1_mean	Mean of PMI items score at T1
PMI_T2_sum	Sum of PMI items score at T2
PMI_T2_MEAN	Mean of PMI items score at T2
PMI_M1_sum	Sum of PMI items score at M1
PMI_m1_mean	Mean of PMI items score at M1
PMI_m2_sum	Sum of PMI items score at M2
PMI_m2_mean	Mean of PMI items score at M2
