# Supplementary material for: Effectiveness of a modified Balint group process on empathy and psychological skills employing Kirkpatrick’s evaluation framework
Source: PeerJ. 2023 Jul 19;11:e15279. doi: 10.7717/peerj.15279 (PMC10362841; doi:10.7717/peerj.15279)
Supplement: Supplemental Information 2 [file peerj-11-15279-s002.xlsx]

## Sheet: Care scores raw data
resident	phase	Age	Gender	Marital_status	current_complaint	HBP	Diabetes	HBC	thyroid_disease	RA	depression	GAD	OCD	others	date	question1	question2	question3	question4	question5	question6	question7	question8	question9	question10	notes	CARE_SCORE
8	1	54	2	1	defecation problems	1	1	1	1	1	1	1	1		april	4	5	6	5	5	4	5	5	5	5		49
1	2	33	2	1	thigh mass	#NULL!	#NULL!	#NULL!	#NULL!	#NULL!	#NULL!	#NULL!	#NULL!		april	4	4	4	4	4	3	5	4	3	4		39
2	2	21	1	2	lack of sleep	#NULL!	#NULL!	#NULL!	#NULL!	#NULL!	#NULL!	#NULL!	#NULL!		april	5	5	5	5	5	5	5	5	5	5		50
2	2	27	1	2	dyspepsia	#NULL!	#NULL!	#NULL!	#NULL!	#NULL!	#NULL!	#NULL!	#NULL!		april	5	5	5	5	5	5	5	5	5	5		50
2	2	24	1	2	breast pain	#NULL!	#NULL!	#NULL!	#NULL!	#NULL!	#NULL!	#NULL!	#NULL!	bipolar	april	5	5	5	5	5	5	5	5	5	5		50
2	2	19	1	2	routine exam	#NULL!	#NULL!	#NULL!	#NULL!	#NULL!	#NULL!	#NULL!	#NULL!		april	4	4	4	3	4	4	4	4	5	4		40
2	2	28	1	1	epigastric pain	#NULL!	#NULL!	#NULL!	#NULL!	#NULL!	#NULL!	#NULL!	#NULL!	migraine	april	4	5	5	5	5	4	4	4	4	4		44
3	2	29	1	2	menorrhagia	#NULL!	#NULL!	#NULL!	#NULL!	#NULL!	#NULL!	#NULL!	#NULL!	aortic insufficiency	april	5	5	5	5	5	5	5	5	5	5	holistic approach is very very rewadding for me as a patient	50
3	2	74	1	1	flank pain	#NULL!	2	2	#NULL!	#NULL!	#NULL!	#NULL!	#NULL!		april	5	4	3	5	3	5	4	4	5	5		43
3	2	39	2	1	first check up	2	#NULL!	#NULL!	#NULL!	#NULL!	#NULL!	#NULL!	#NULL!		april	4	4	4	4	3	4	4	4	3	4		38
4	2	80	1	1	allergy post vaccination	2	2	2	#NULL!	#NULL!	#NULL!	#NULL!	#NULL!		april	3	4	3	3	3	3	3	3	3	3		31
4	2	20	2	2	follow up on blood pressur	#NULL!	#NULL!	#NULL!	#NULL!	#NULL!	#NULL!	#NULL!	#NULL!		april	5	1	1	2	2	2	2	1	2	1		19
4	2	39	2	1	follow up	#NULL!	#NULL!	#NULL!	#NULL!	#NULL!	#NULL!	#NULL!	#NULL!		april	5	5	4	4	5	4	4	5	4	5		45
4	2	30	1	1		#NULL!	#NULL!	#NULL!	#NULL!	#NULL!	#NULL!	#NULL!	#NULL!		april	5	5	5	5	5	5	5	5	5	5		50
4	2	24	2	2	high bp	#NULL!	#NULL!	#NULL!	#NULL!	#NULL!	#NULL!	#NULL!	#NULL!		april	5	5	5	5	5	5	5	5	5	5		50
4	2	25	1	2	dry skin	#NULL!	#NULL!	#NULL!	#NULL!	#NULL!	#NULL!	#NULL!	#NULL!		april	5	5	5	5	4	5	5	5	4	5		48
4	2	22	1	2	joint pain	#NULL!	#NULL!	#NULL!	#NULL!	#NULL!	#NULL!	#NULL!	#NULL!		april	4	4	5	4	4	4	5	5	4	5		44
5	2	34	1	2	check up	#NULL!	#NULL!	#NULL!	#NULL!	#NULL!	#NULL!	#NULL!	#NULL!		april	5	5	5	5	5	5	5	4	5	5		49
5	2	60	1	4	follow up after ingornw to	#NULL!	#NULL!	#NULL!	#NULL!	#NULL!	#NULL!	#NULL!	#NULL!		april	5	5	5	5	5	5	5	5	5	5		50
5	2	37	#NULL!	1	routine exam	#NULL!	#NULL!	#NULL!	#NULL!	#NULL!	#NULL!	#NULL!	#NULL!		april	5	5	4	5	5	5	5	5	5	5		49
5	2	24	1	2	allergic rhinitis	#NULL!	#NULL!	#NULL!	#NULL!	#NULL!	#NULL!	#NULL!	#NULL!		april	5	5	5	5	5	5	5	5	5	5		50
5	2	23	2	2	general check up	#NULL!	#NULL!	#NULL!	#NULL!	#NULL!	#NULL!	#NULL!	#NULL!		april	5	5	5	5	5	5	5	5	5	5		50
6	2	73	1	1	check up	2	#NULL!	2	#NULL!	#NULL!	#NULL!	#NULL!	#NULL!		april	5	5	5	5	5	5	5	5	5	5		50
6	2	68	1	1	rfular chekc up	2	2	2	2	#NULL!	#NULL!	#NULL!	#NULL!		april	5	5	5	5	5	5	5	5	5	5		50
7	2	60	2	1	leg pain	2	2	2	#NULL!	#NULL!	#NULL!	#NULL!	#NULL!		april	4	5	5	5	5	5	5	5	5	5		49
7	2	52	2	1	back pain	#NULL!	#NULL!	#NULL!	#NULL!	#NULL!	#NULL!	#NULL!	#NULL!		april	4	4	4	4	4	4	4	4	4	4		40
7	2	25	1	2	reviewing side effect	#NULL!	#NULL!	#NULL!	#NULL!	#NULL!	2	2	#NULL!	PTSD	april	5	5	5	5	4	5	5	5	5	5		49
7	2	41	1	1	routine	#NULL!	#NULL!	#NULL!	#NULL!	#NULL!	#NULL!	#NULL!	#NULL!		april	5	5	5	5	5	5	5	5	5	5		50
7	2	19	2	2	general routine	#NULL!	#NULL!	#NULL!	#NULL!	#NULL!	#NULL!	#NULL!	#NULL!		april	4	4	4	3	4	4	4	4	4	4		39
8	2	60	1	1		2	#NULL!	2	#NULL!	#NULL!	#NULL!	2	#NULL!		april	4	4	4	4	4	4	4	4	4	4		40
8	2	27	2	1	follow up	2	#NULL!	#NULL!	#NULL!	#NULL!	#NULL!	#NULL!	#NULL!		april	3	4	4	4	4	4	4	4	4	4		39
8	2	47	1	1	follow up	2	#NULL!	#NULL!	#NULL!	#NULL!	#NULL!	#NULL!	#NULL!		april	5	5	5	5	5	5	5	5	5	5		50
1	1	37	1	1	Anemia and migraine	1	1	1	1	1	1	1	1	Anemia and migraine	august	5	5	5	5	5	5	5	5	5	5	HE IS VERY PROFESSIONAL PRACTIIONER HE LSITENS TO HIS PATIENTS AND MAKES THEM FEEL COMFORTABLE	50
1	1	21	1	2	Anxiety and period problem	1	1	1	1	1	2	2	1	migraine	august	5	5	5	4	5	5	5	5	5	5		49
1	1	23	2	2	headache-back pain	1	1	1	1	1	1	1	1		august	5	5	5	5	5	4	5	5	4	5		48
1	1	24	1	2	Iron deficiency anemia	1	1	1	1	1	1	1	1	iron def anemia	august	5	5	5	5	5	5	5	5	5	5		50
3	1	52	1	4	hypertension	2	2	2	1	2	1	1	1	myopia	august	4	4	4	4	4	4	5	5	5	5		44
5	1	24	1	2		1	1	1	1	1	1	1	1		august	5	5	5	5	5	5	5	5	5	5		50
7	1	23	1	1	abdominal pain/melena	1	1	1	1	1	1	1	1		august	5	5	5	5	5	5	5	5	5	5		50
1	1	47	1	1	stress	1	1	1	1	1	1	1	1		december	4	4	4	4	4	4	4	4	4	4		40
1	1	44	2	1	follow up	1	2	2	1	1	1	1	1		december	3	3	3	4	3	3	4	4	3	3		33
1	1	26	1	1	abdominal discomfort	1	1	1	1	1	1	1	1		december	5	5	5	5	5	5	5	5	5	5		50
2	1	19	1	2	flu	1	2	1	1	1	1	1	1		december	2	2	5	5	3	3	2	5	2	2		31
2	1	71	1	1	knee pain	2	1	1	1	1	1	1	1	ostoeporosis	december	3	3	4	4	4	3	3	3	3	2		32
2	1	66	2	1	renew medications	2	2	2	1	1	1	1	1		december	5	5	5	5	4	5	5	5	5	5		49
2	1	52	1	1	arm pain	1	1	1	1	1	1	1	1	disc	december	4	5	5	4	4	5	4	5	5	5		46
2	1	49	2	1	GI problems	1	1	1	1	1	1	1	1		december	4	4	4	4	4	4	4	4	4	4		40
2	1	19	1	2	follow up	1	1	1	1	1	2	1	1		december	4	2	4	4	4	4	3	3	4	5		37
2	1	34	2	2	hip pain	1	1	1	1	1	1	1	2		december	4	4	5	5	3	4	4	3	3	5		40
2	1	18	1	2	follow up	1	1	1	1	1	1	1	1		december	4	4	4	5	4	4	4	4	3	5		41
3	1	33	1	1	dyspnea	1	1	1	1	1	1	1	1		december	4	5	5	5	5	5	5	4	4	5		47
3	1	25	1	2	referal	1	1	1	1	1	2	1	1		december	3	3	3	3	3	3	3	3	3	3		30
3	1	20	1	2	follow up	1	1	1	1	1	2	2	1		december	5	5	5	5	5	5	5	5	5	5	he is an amazing doctor	50
3	1	88	1	1	headache	2	1	2	1	1	1	1	1		december	5	5	5	5	5	5	5	5	5	5		50
3	1	36	2	2	chronic headache	1	1	2	1	1	1	1	1		december	5	5	4	5	5	5	5	5	5	5		49
4	1	18	1	2	dehydration	1	1	1	1	1	1	1	1		december	4	4	4	4	4	4	4	4	4	4		40
4	1	20	1	2	dizziness and tiredness	1	1	1	1	1	1	1	1	G6PD	december	5	4	4	4	4	4	4	4	4	4		41
4	1	18	2	2	insomina/stress	1	1	1	1	1	2	2	1		december	5	5	5	4	5	5	5	6	4	5		49
5	1	75	1	1	follow up	2	1	2	2	1	1	1	1	ostoeporosis	december	5	5	5	5	5	5	5	5	5	5		50
5	1	23	1	2	follow up	1	1	1	1	1	1	1	1		december	4	4	4	4	4	4	4	4	4	4		40
5	1	32	1	1	foot pain	1	1	1	1	1	1	1	1		december	5	5	5	5	5	5	5	5	5	5		50
6	1	18	1	2	headache	1	1	1	1	1	1	1	1		december	5	5	4	4	5	5	4	5	4	5	this is my first visit. surprised how proffesional and compassionate she is.	46
6	1	39	1	1	chest pain	1	1	1	1	1	1	1	1		december	5	5	5	5	5	5	5	5	5	5	she was perfect and supportive	50
6	1	53	1	1	depression	1	1	1	1	1	2	1	1		december	4	4	4	4	4	4	4	4	4	4		40
6	1	40	2	1	follow up	1	1	1	1	1	1	1	1		december	4	4	3	4	4	3	3	4	4	3		36
6	1	61	1	2	influenza vaccine	2	1	2	1	1	2	1	1	arrythmia	december	5	5	5	5	5	5	5	5	5	5		50
6	1	36	1	3	iron deficiency anemia	1	1	1	1	1	1	1	1	iron deficiency anemi	december	5	5	5	5	5	5	5	5	5	5		50
6	1	22	1	2	allergy	1	1	1	1	1	1	1	1		december	5	5	5	5	5	5	5	5	5	5		50
6	1	21	1	2	anemia	1	1	1	1	1	1	1	1		december	4	4	4	4	4	4	5	5	4	5		43
7	1	21	2	2		1	1	1	1	1	1	1	1		december	4	4	4	4	4	4	4	4	4	4		40
7	1	22	1	2	iron deficiency anemia	1	1	1	1	1	1	1	1		december	5	5	5	5	5	5	5	5	5	5		50
7	1	19	1	2	ear wax removing	1	1	1	1	1	1	1	1		december	4	5	5	5	4	5	5	5	5	5		48
7	1	20	1	2	skin problems	1	1	2	1	1	1	1	1		december	5	5	5	5	5	5	5	4	3	5		47
8	1	29	2	1	hypertension	1	1	1	1	1	1	1	1		december	4	4	4	4	4	4	4	4	4	4		40
8	1	23	1	2	follow up	1	1	1	1	1	1	2	1		december	5	5	5	5	5	5	5	5	5	5		50
8	1	19	1	2	depression	1	1	1	1	1	1	2	1		december	4	4	4	5	4	5	5	4	4	4		43
2	2	27	2	2	liver problems	1	1	1	1	1	1	1	1		february	3	3	2	3	3	3	3	4	3	4		31
3	2	52	1	1	flank pain-nausea	2	1	2	1	1	1	2	1		february	5	5	5	5	5	5	5	5	4	5		49
3	2	34	1	1	anxiety	1	1	1	1	1	1	2	1		february	4	5	4	5	4	5	4	5	5	4		45
4	2	23	1	1	Referal	1	1	1	1	1	1	1	1	asthma	february	3	5	5	4	3	5	4	3	5	2		39
5	2	61	2	4	heart failure	2	2	2	1	1	2	1	1		february	5	5	5	5	5	5	5	5	5	5		50
5	2	73	1	1	follow up	2	1	2	1	2	1	1	1		february	4	4	5	4	4	5	4	4	5	4		43
5	2	62	1	4	follow up	1	2	2	1	1	1	1	1		february	5	5	5	5	5	5	5	5	5	5	dr is a very nice doctor and cooperative and being social and interactive. he has a veru good attitude	50
6	2	54	1	1	back pain	1	1	2	1	1	1	1	1	allergy	february	5	5	5	5	5	5	5	5	5	5	excellent doctor	50
6	2	20	1	2	nassea/PCOS	1	1	1	1	1	1	1	1	PCOS	february	5	4	3	4	4	3	5	5	4	5		42
7	2	19	1	2	referal to pscychaitrist	1	1	1	1	1	2	2	1		february	5	5	5	5	5	5	5	5	5	5		50
7	2	22	1	2	referal	1	1	1	1	1	1	1	1	asthma	february	4	5	4	5	5	5	5	4	5	5		47
7	2	37	2	1	stomache pain	1	1	1	1	1	1	1	1		february	5	5	5	5	5	5	5	5	5	5		50
5	1	18	1	2	follow up	1	1	1	1	1	2	1	1		january	5	5	5	5	5	5	5	5	5	5		50
5	1	54	2	1	UL and LL pain	1	1	1	1	1	1	1	1		january	5	5	5	5	5	5	5	5	5	5	very good	50
5	1	54	2	1	LL pain	2	1	1	1	1	1	1	1	stroke	january	5	5	5	5	5	5	5	5	5	5	everything is great	50
6	1	20	1	2	follow up	1	1	1	1	1	1	1	1		january	5	5	5	5	5	5	5	5	5	5		50
8	1	56	2	1	hip pain	1	2	2	1	1	1	1	1		january	5	5	5	5	5	5	5	5	5	5		50
8	1	20	1	2	LL pain UL pain	1	1	1	1	1	1	1	1		january	4	4	4	4	4	4	4	4	4	4		40
1	2	36	1	2	stomach ache-swollen legs	1	1	1	1	1	1	1	1		march	4	4	4	4	4	4	5	5	5	5		44
1	2	30	2	1	skinf infection	1	1	1	1	1	1	1	1		march	5	5	5	5	5	5	4	5	6	4		49
1	2	18	1	2	referal to psychaitrist	1	1	1	1	1	1	1	1	ADHD	march	5	5	5	5	5	5	5	5	5	5		50
1	2	75	1	2	right upper quadrant pain	2	1	2	1	1	1	1	1	Afib	march	4	4	4	4	4	4	4	4	4	4		40
1	2	34	2	2	check up	1	1	1	1	1	1	1	1		march	5	5	5	5	5	5	5	5	5	5		50
1	2	24	2	2	heartbrun	1	1	1	1	1	1	1	1	liver problems-kidney problems-acidity	march	4	4	3	4	3	4	4	4	4	4		38
1	2	21	2	2	light headadness	#NULL!	#NULL!	#NULL!	#NULL!	#NULL!	#NULL!	#NULL!	#NULL!		march	5	5	4	3	4	6	5	5	4	4		45
2	2	43	2	1	finger fracture	#NULL!	#NULL!	2	#NULL!	#NULL!	#NULL!	#NULL!	#NULL!	heart disease	march	5	5	5	5	5	5	5	5	5	5		50
2	2	28	2	2	general routine	#NULL!	#NULL!	#NULL!	#NULL!	#NULL!	#NULL!	#NULL!	#NULL!		march	5	5	4	4	5	4	5	5	5	5		47
4	2	23	1	2	dizziness	1	1	1	1	1	1	1	1	Hodgkin lymphoma-PCOS	march	5	5	5	5	5	5	5	5	5	5		50
7	2	50	1	2	headache	1	1	1	1	1	1	1	1	acid reflex	march	5	5	5	5	5	5	5	5	5	5		50
1	2	22	1	2		#NULL!	#NULL!	#NULL!	#NULL!	#NULL!	#NULL!	#NULL!	#NULL!		may	5	5	5	5	5	5	5	5	5	5		50
2	2	64	2	1	referral	2	#NULL!	2	#NULL!	#NULL!	#NULL!	#NULL!	#NULL!		may	4	4	4	6	6	4	4	4	6	6		48
2	2	22	2	#NULL!		#NULL!	#NULL!	#NULL!	#NULL!	#NULL!	#NULL!	#NULL!	#NULL!		may	5	5	5	5	4	5	5	5	4	5		48
2	2	68	2	1	ear pain	2	#NULL!	#NULL!	#NULL!	#NULL!	#NULL!	#NULL!	#NULL!		may	3	3	3	3	6	3	3	3	3	3		33
3	2	70	2	3	renew prescription	#NULL!	2	2	#NULL!	#NULL!	#NULL!	#NULL!	#NULL!		may	5	5	5	5	5	5	5	5	5	5		50
3	2	95	2	1	ear exam	2	#NULL!	2	#NULL!	#NULL!	#NULL!	#NULL!	#NULL!		may	5	5	5	3	6	5	5	5	5	4		48
4	2	21	2	2	smoking cessation	2	#NULL!	2	#NULL!	#NULL!	2	#NULL!	#NULL!		may	5	4	4	5	5	5	5	5	5	5		48
4	2	21	1	2	follow up	#NULL!	#NULL!	#NULL!	#NULL!	#NULL!	#NULL!	#NULL!	#NULL!		may	4	4	5	5	5	5	5	5	5	5		48
4	2	31	2	1		#NULL!	#NULL!	#NULL!	#NULL!	#NULL!	#NULL!	#NULL!	#NULL!		may	5	5	5	5	5	5	5	5	5	5		50
4	2	34	1	1	abd pain	#NULL!	#NULL!	#NULL!	#NULL!	#NULL!	#NULL!	#NULL!	#NULL!		may	5	5	5	5	5	5	5	5	5	5		50
5	2	33	2	1	rib fracture	#NULL!	#NULL!	#NULL!	#NULL!	#NULL!	#NULL!	#NULL!	#NULL!		may	5	5	5	5	5	5	5	5	5	5		50
5	2	31	2	2	jaw pain	#NULL!	#NULL!	#NULL!	#NULL!	#NULL!	#NULL!	#NULL!	#NULL!		may	5	5	5	4	4	5	4	5	4	5	i told him its the most comprehensive visit I have in FM. WE alos made a plan for age needed visit	46
6	2	58	1	1	breast exam	2	#NULL!	2	2	2	#NULL!	#NULL!	#NULL!		may	3	3	3	3	3	3	3	3	3	3		30
6	2	21	1	2	rutine	#NULL!	#NULL!	#NULL!	#NULL!	#NULL!	#NULL!	#NULL!	#NULL!		may	5	5	5	5	5	5	5	5	5	5		50
6	2	65	2	1	THRYOID EXAM	2	2	2	#NULL!	#NULL!	#NULL!	#NULL!	#NULL!		may	4	4	4	4	4	4	4	4	4	4		40
8	2	28	2	2	medical report	#NULL!	#NULL!	#NULL!	#NULL!	#NULL!	#NULL!	#NULL!	2		may	5	5	5	5	5	5	5	4	4	5		48
8	2	19	1	2	GAD	#NULL!	#NULL!	#NULL!	#NULL!	#NULL!	2	2	#NULL!		may	5	5	5	5	5	5	5	5	5	5		50
8	2	32	1	3	kidney stones	#NULL!	#NULL!	#NULL!	#NULL!	#NULL!	#NULL!	#NULL!	#NULL!		may	5	5	4	5	5	5	4	4	5	4		46
8	2	66	1	1	regular follow up	#NULL!	2	2	#NULL!	#NULL!	#NULL!	#NULL!	#NULL!		may	4	3	3	3	3	3	3	4	4	4		34
2	1	66	2	1	follow up	1	1	2	1	2	1	1	1		november	5	4	3	4	5	4	4	4	4	5		42
5	1	55	1	1	LL pain	1	2	1	1	1	1	1	1		november	5	5	5	5	5	5	5	5	5	5	He is an excellent doctor	50
5	1	37	1	2	iron deficiency anemia	1	1	1	2	1	1	1	1		november	4	4	4	4	4	4	4	4	4	4		40
7	1	26	1	2	follow up	1	1	2	1	1	1	1	1		november	5	5	4	5	4	5	4	5	3	3		43
7	1	25	2	2	joint pain	1	1	2	1	2	2	2	1		november	5	5	4	4	5	5	5	5	4	5		47
7	1	21	2	2	headache	1	1	1	1	1	1	2	2		november	5	5	4	4	5	5	5	4	4	5		46
7	1	20	1	2	obgyn referal	1	1	1	1	1	1	1	1		november	4	5	4	5	4	5	5	5	5	5		47
7	1	19	1	2	chronic cough	1	1	1	1	2	1	1	1		november	5	5	4	4	4	5	5	5	4	5		46
7	1	18	1	2	follow up	1	1	1	1	1	1	2	1		november	5	4	5	5	5	5	5	5	4	5		48
7	1	38	2	1		1	1	1	1	1	1	2	1		november	4	4	4	4	4	3	4	4	3	4		38
2	1	22	1	2	follow up	1	1	1	1	1	1	1	1		october	5	5	5	5	5	5	5	5	5	5	very friendly	50
3	1	68	2	#NULL!	follow up	2	1	2	1	1	1	1	1		october	5	5	5	5	5	5	5	5	5	5		50
3	1	26	2	2		1	1	1	1	1	1	1	1		october	5	5	5	5	5	5	5	5	5	5	he is the best	50
3	1	81	2	1	follow up	2	1	2	2	1	1	1	1		october	5	5	5	5	5	5	5	5	5	5		50
4	1	41	1	2	hypertention	1	1	1	1	1	1	1	1		october	5	5	5	5	5	5	5	5	5	5	the doctor give me an email to follow up on any recent BP reading and asked me about the lifestyle chances we had to agree on previously	50
4	1	25	2	2	swimmer ear	1	1	1	1	1	2	2	1		october	5	5	5	5	5	5	5	5	5	5		50
8	1	23	1	2	follow up	1	1	1	1	1	1	1	1		october	5	5	5	5	5	5	5	5	5	5	excelent docor	50
8	1	23	1	2	follow up	1	1	1	1	1	1	2	2		october	5	5	5	5	5	5	5	5	5	5		50
1	1	82	1	1	GOLD	2	1	1	1	2	1	1	1	osteoporosis	september	5	5	5	5	5	5	5	5	5	5		50
1	1	20	2	2	Follow up	1	1	1	1	1	1	1	1		september	5	5	5	5	5	5	5	5	5	5		50
4	1	21	1	2	irregular mentrual period	2	1	1	1	1	1	1	1			5	5	5	5	5	5	5	5	5	5		50

## Sheet: Code
phase	1: preintervention	2: post intervention
Gender	1: female	2: male
Marital_status	1: married	2: single	3: divorced	4: widow
HBP (Blood pressure)	1: no	2: yes
Diabetes	1: no	2: yes
HBC (lipidemia)	1: no	2: yes
thyroid_disease	1: no	2: yes
RA (rheumatoid arthritis)	1: no	2: yes
depression	1: no	2: yes
GAD (anxiety)	1: no	2: yes
OCD (obsseessive compulse disorder)
others
question1	1: poor	2: fair	3: good	4: very good	5: excellent
question2	1: poor	2: fair	3: good	4: very good	5: excellent
question3	1: poor	2: fair	3: good	4: very good	5: excellent
question4	1: poor	2: fair	3: good	4: very good	5: excellent
question5	1: poor	2: fair	3: good	4: very good	5: excellent
question6	1: poor	2: fair	3: good	4: very good	5: excellent
question7	1: poor	2: fair	3: good	4: very good	5: excellent
question8	1: poor	2: fair	3: good	4: very good	5: excellent
question9	1: poor	2: fair	3: good	4: very good	5: excellent
question10	1: poor	2: fair	3: good	4: very good	5: excellent
notes
CARE_SCORE
